# Supplementary material for: Patient-derived xenograft models of colorectal cancer in pre-clinical research: a systematic review
Source: PubMed Central journal article supplement (PMC5323228; doi:10.18632/oncotarget.11184), 2016-08-10
Supplement: oncotarget-07-66212-s001.pdf [file oncotarget-07-66212-s001.pdf]

# Patient-derived xenograft models of colorectal cancer in pre-clinical research: a systematic review

## Supplementary Material

### S1 – Ovid MEDLINE Search string

(exp Colorectal Neoplasms/ OR colon\* adenocarcinoma\*.mp. OR colon\* cancer\*.mp. OR colon\* tumour\*.mp. OR colon\* carcinoma\*.mp. OR rectal adenocarcinoma\*.mp. OR rectal cancer\*.mp. OR rectal tumour\*.mp. OR rectal carcinoma\*.mp.) AND (exp Heterografts/ OR exp Xenograft Model Antitumor Assays/ OR xenograft\*.mp. AND patient derived.mp. OR explant.mp.)

### S2 – Embase Search String

[colorectal AND ('cancer'/exp OR cancer) OR colon\* AND cancer\* OR colon\* AND tumour\* OR colon\* AND carcinoma\* OR colon\* AND adenocarcinoma\* OR colorectal AND ('tumor'/exp OR tumor) OR colorectal AND ('carcinoma'/exp OR carcinoma) OR 'rectal carcinoma'/exp OR 'rectal carcinoma' OR 'colorectal carcinoma'/exp OR 'colorectal carcinoma' OR 'rectal cancer'/exp OR 'rectal cancer' OR 'colon cancer'/exp OR 'colon cancer' OR 'colon adenocarcinoma'/exp OR 'colon adenocarcinoma' OR 'colorectal cancer'/exp OR 'colorectal cancer' OR 'colon tumor'/exp OR 'colon tumor' OR 'colon carcinoma'/exp OR 'colon carcinoma' OR 'colorectal tumour'/exp OR 'colorectal tumour' OR 'rectal tumor'/exp OR 'rectal tumor'] AND ['xenograft' AND (explant OR 'patient derived')] AND [english]/lim AND [embase]/lim
